# Supplementary material for: Projecting the seasonality of endemic COVID-19
Source: bioRxiv or medRxiv preprint supplement (doi:10.1101/2022.01.26.22269905), 2022-10-07
Supplement: Supplementary file [file media-1.pdf]

## Projecting the seasonality of endemic COVID-19

### Supplementary materials

#### Contents

|                        |       |    |
|------------------------|-------|----|
| Investigators          | ..... | 02 |
| Supplemental Figure S1 | ..... | 03 |
| Supplemental Figure S2 | ..... | 04 |
| Supplemental Figure S3 | ..... | 05 |
| Supplemental Figure S4 | ..... | 06 |
| Supplemental Figure S5 | ..... | 07 |
| Supplemental Figure S6 | ..... | 08 |
| Supplemental Figure S7 | ..... | 09 |
| Supplemental Figure S8 | ..... | 10 |

**Investigators**

Jeffrey P. Townsend<sup>1,2,3,4\*</sup>,  
April D. Lamb<sup>5</sup>,  
Hayley B. Hassler<sup>1</sup>,  
Pratha Sah<sup>6</sup>,  
Aia Alvarez Nishio<sup>7</sup>,  
Cameron Nguyen<sup>5</sup>,  
Alexandra Tew<sup>5</sup>,  
Alison P. Galvani<sup>6</sup>,  
Alex Dornburg<sup>5</sup>

**Affiliations**

<sup>1</sup>*Department of Biostatistics, Yale School of Public Health; New Haven, Connecticut, USA*

<sup>2</sup>*Department of Ecology and Evolutionary Biology, Yale University; New Haven, Connecticut, USA*

<sup>3</sup>*Program in Computational Biology and Bioinformatics, Yale University; New Haven, Connecticut, USA*

<sup>4</sup>*Program in Microbiology, Yale University; New Haven, Connecticut, USA*

<sup>5</sup>*Department of Bioinformatics and Genomics, University of North Carolina at Charlotte; Charlotte, NC*

<sup>6</sup>*Center for Infectious Disease Modeling and Analysis, Yale University; New Haven, Connecticut 06510, USA*

<sup>7</sup>*Yale College; New Haven, Connecticut 06510, USA*

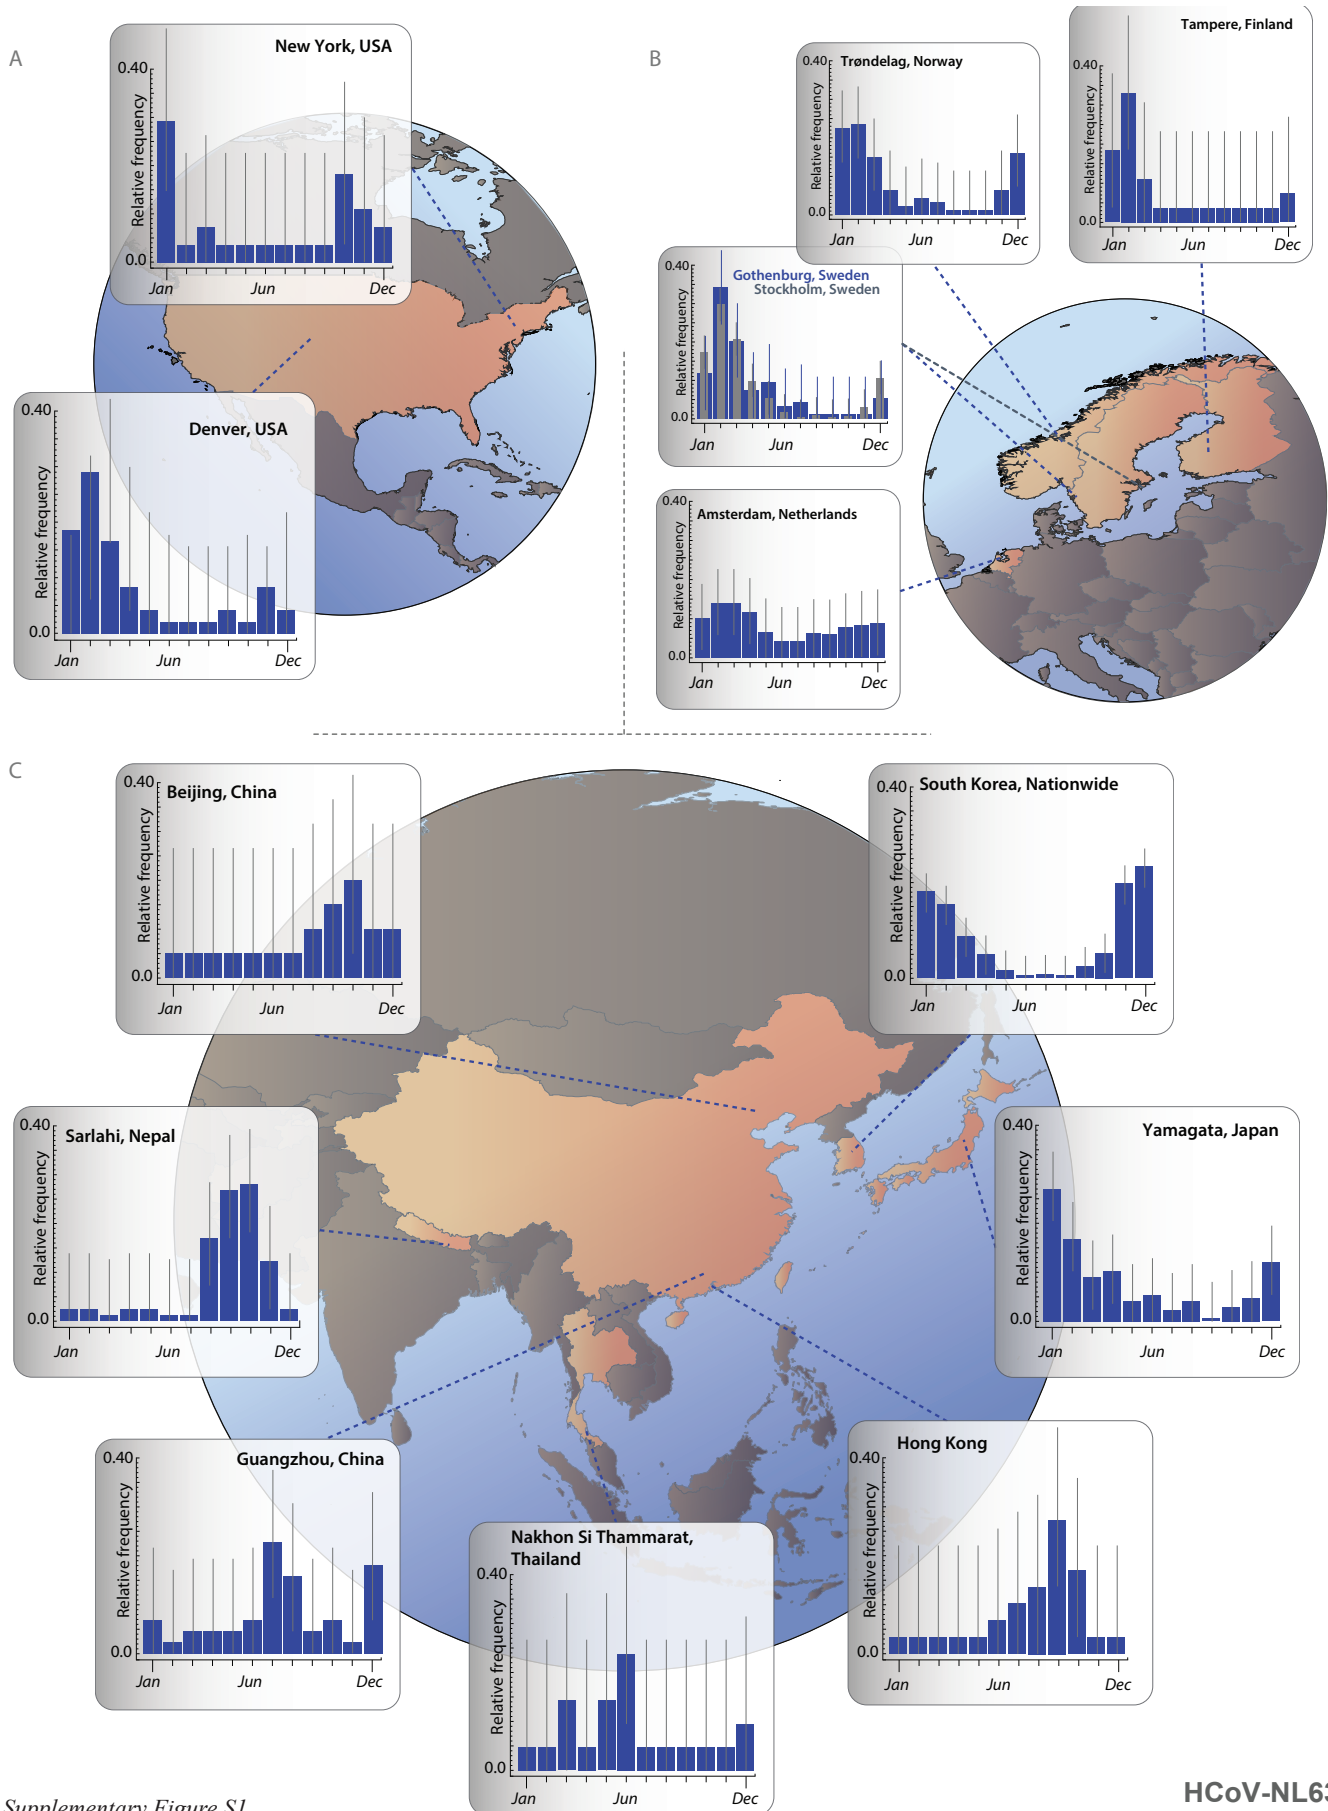

Supplementary Figure S1

Proportions of HCoV-NL63 infections by month across locations in (A) North America, (B) Europe, and (C) Asia. Vertical gray bars indicate 95% confidence interval of raw monthly infections.

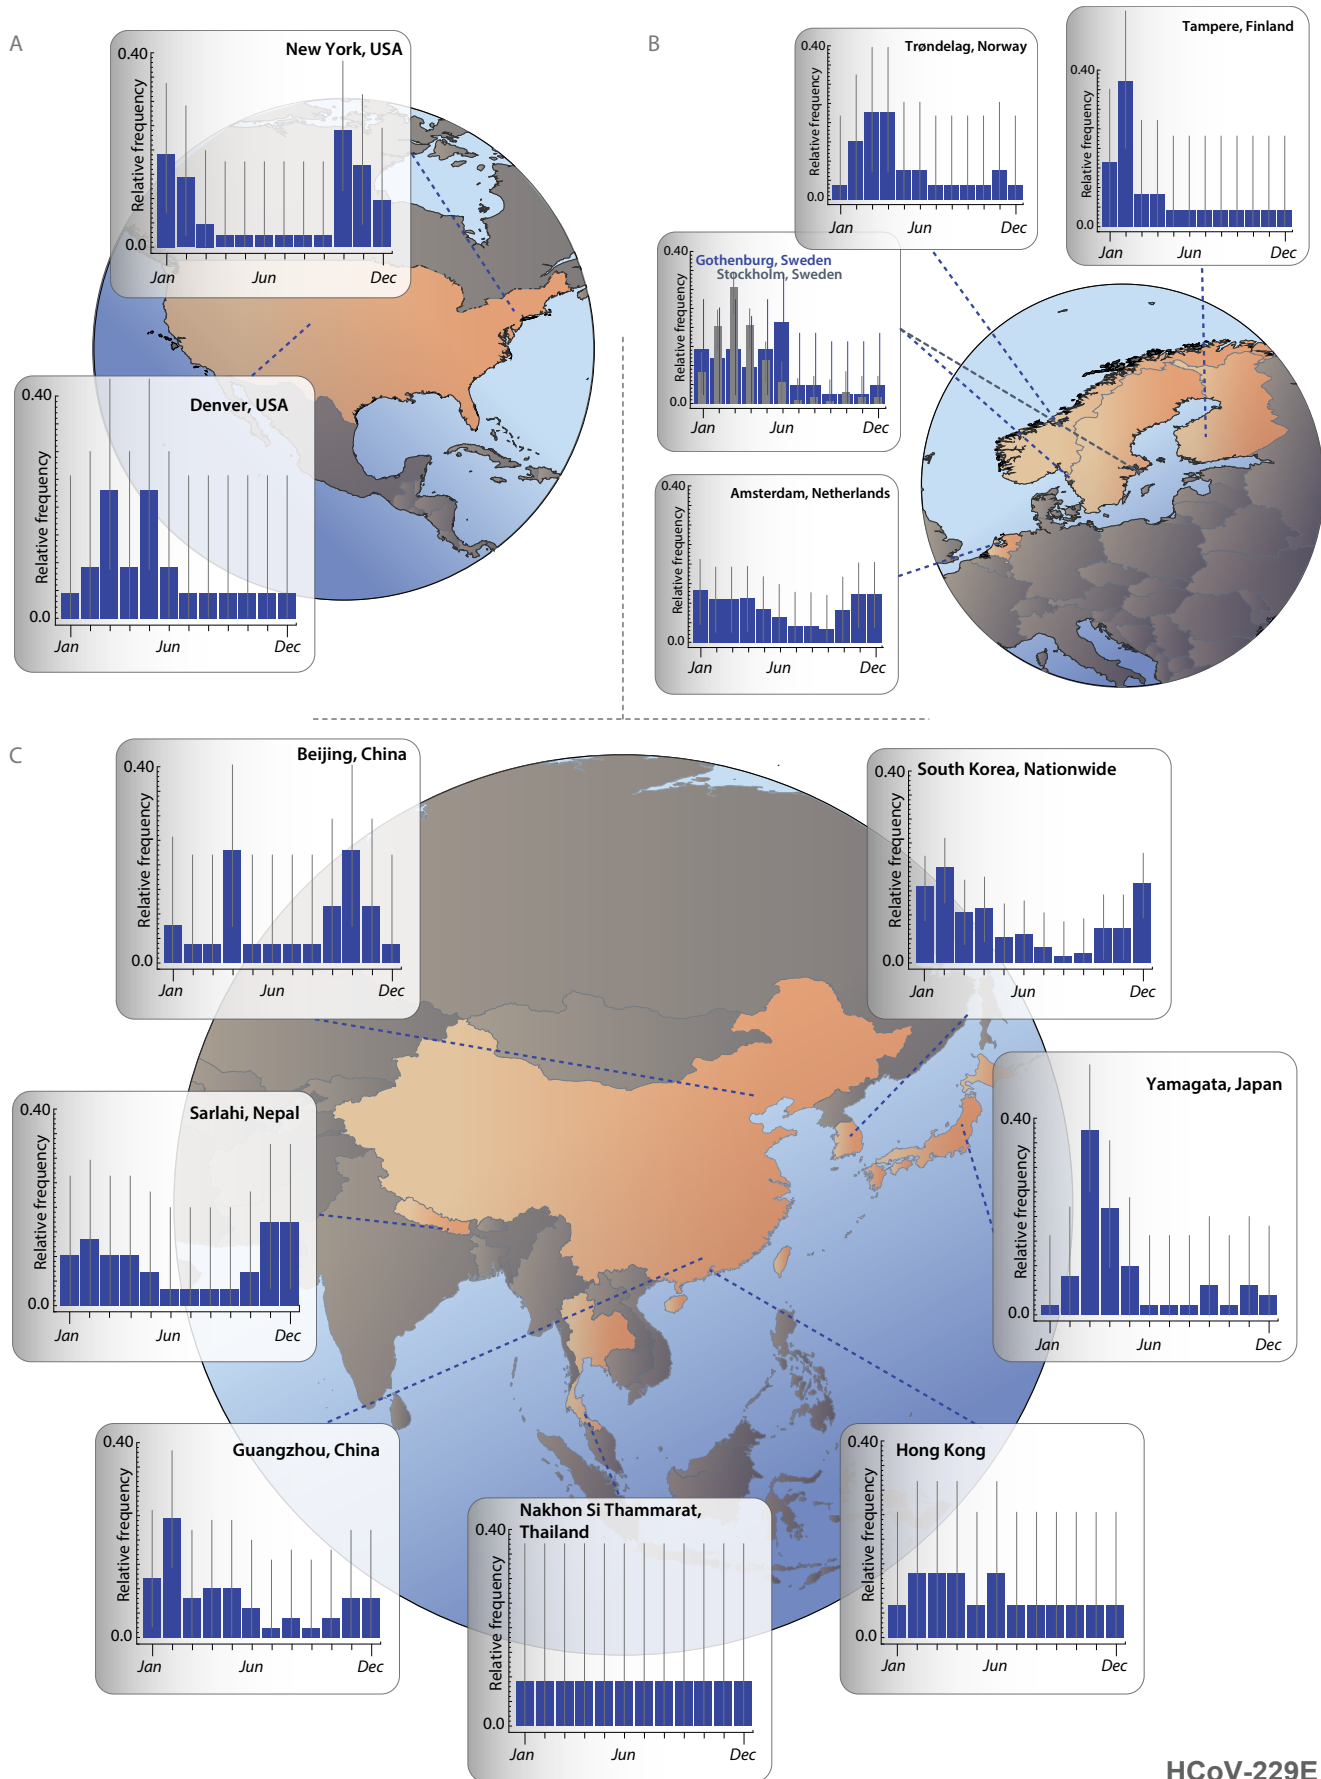

HCoV-229E

## Supplementary Figure S2

Proportions of HCoV-229E infections by month across locations in (A) North America, (B) Europe, and (C) Asia. Vertical gray bars indicate 95% confidence interval of raw monthly infections.

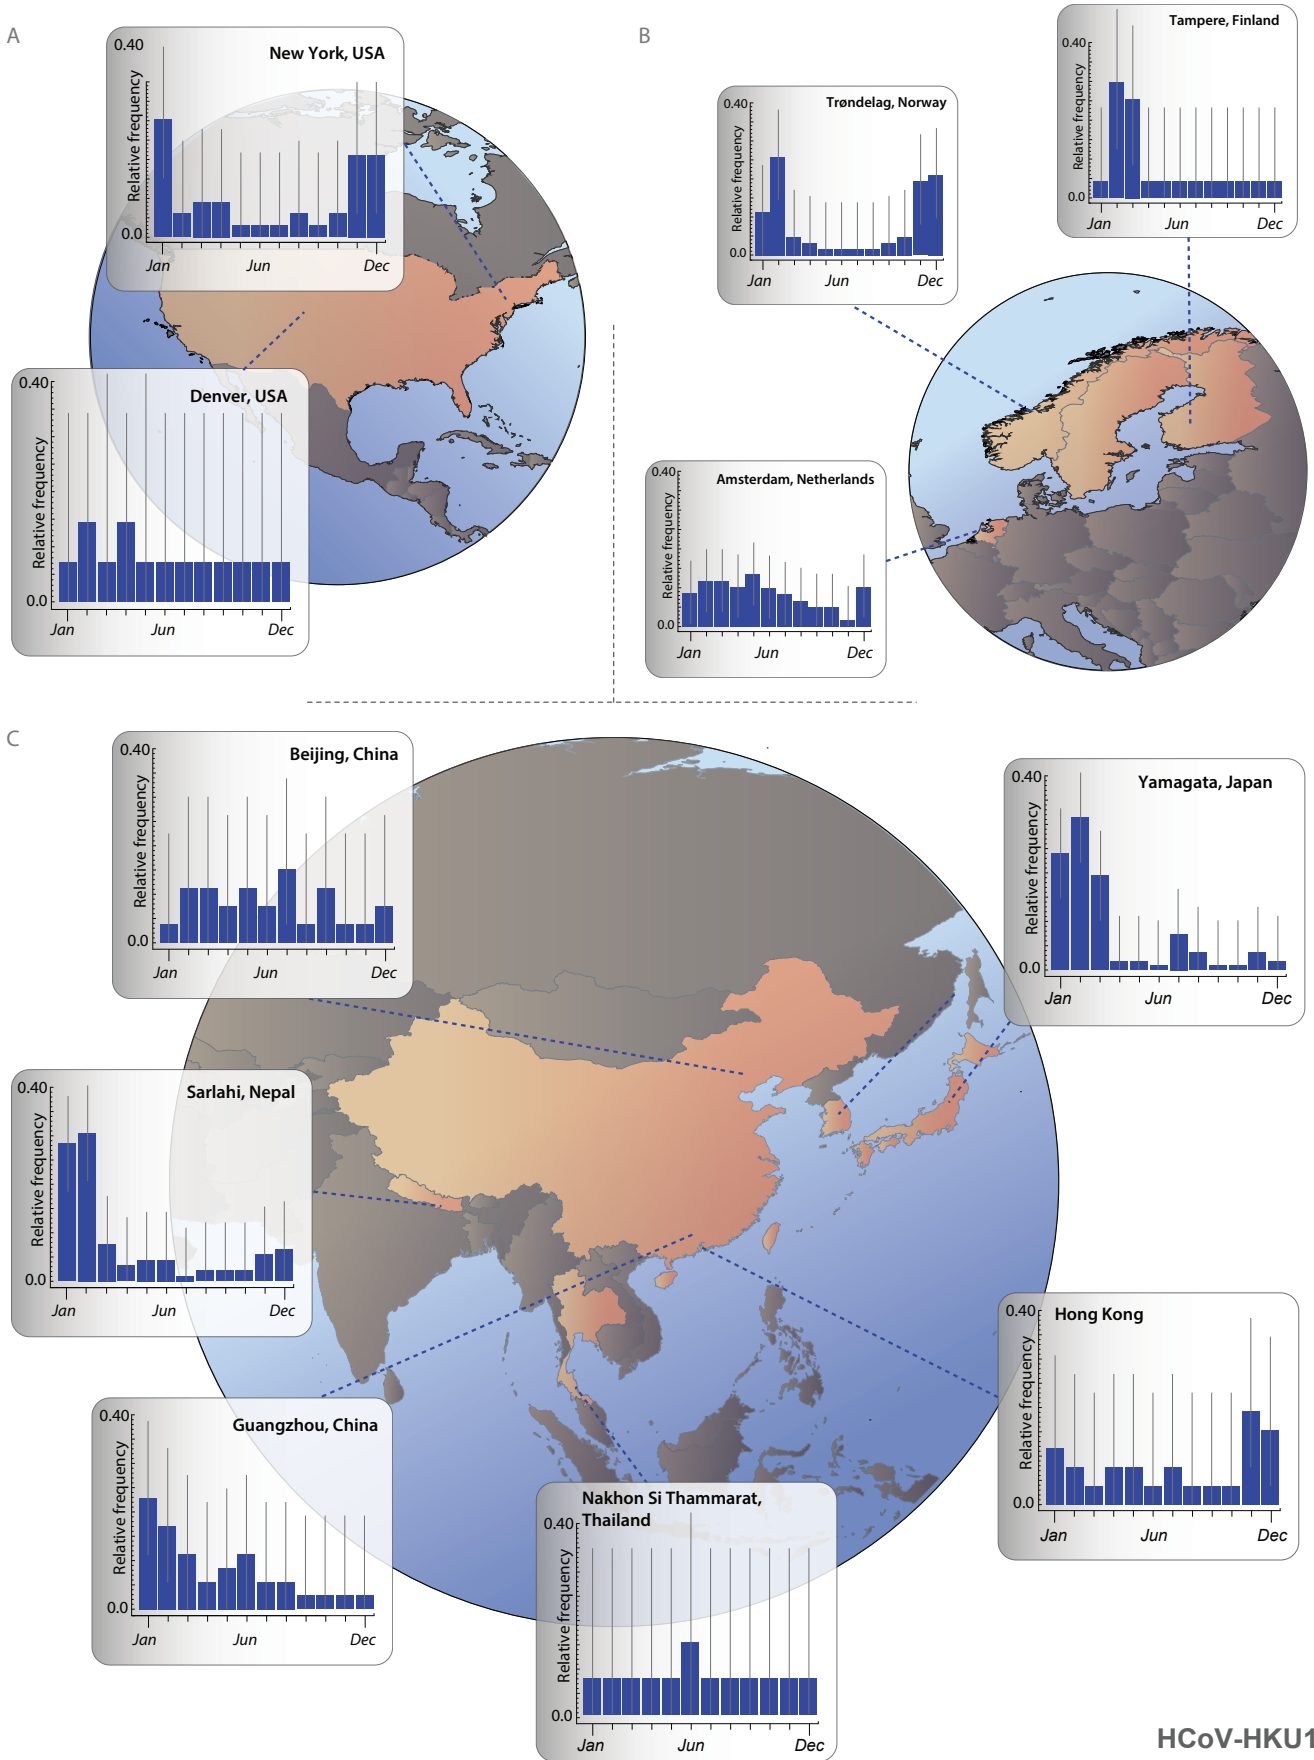

HCoV-HKU1

Supplementary Figure S3

Proportions of HCoV-HKU1 infections by month across locations in (A) North America, (B) Europe, and (C) Asia. Vertical gray bars indicate 95% confidence interval of raw monthly infections.

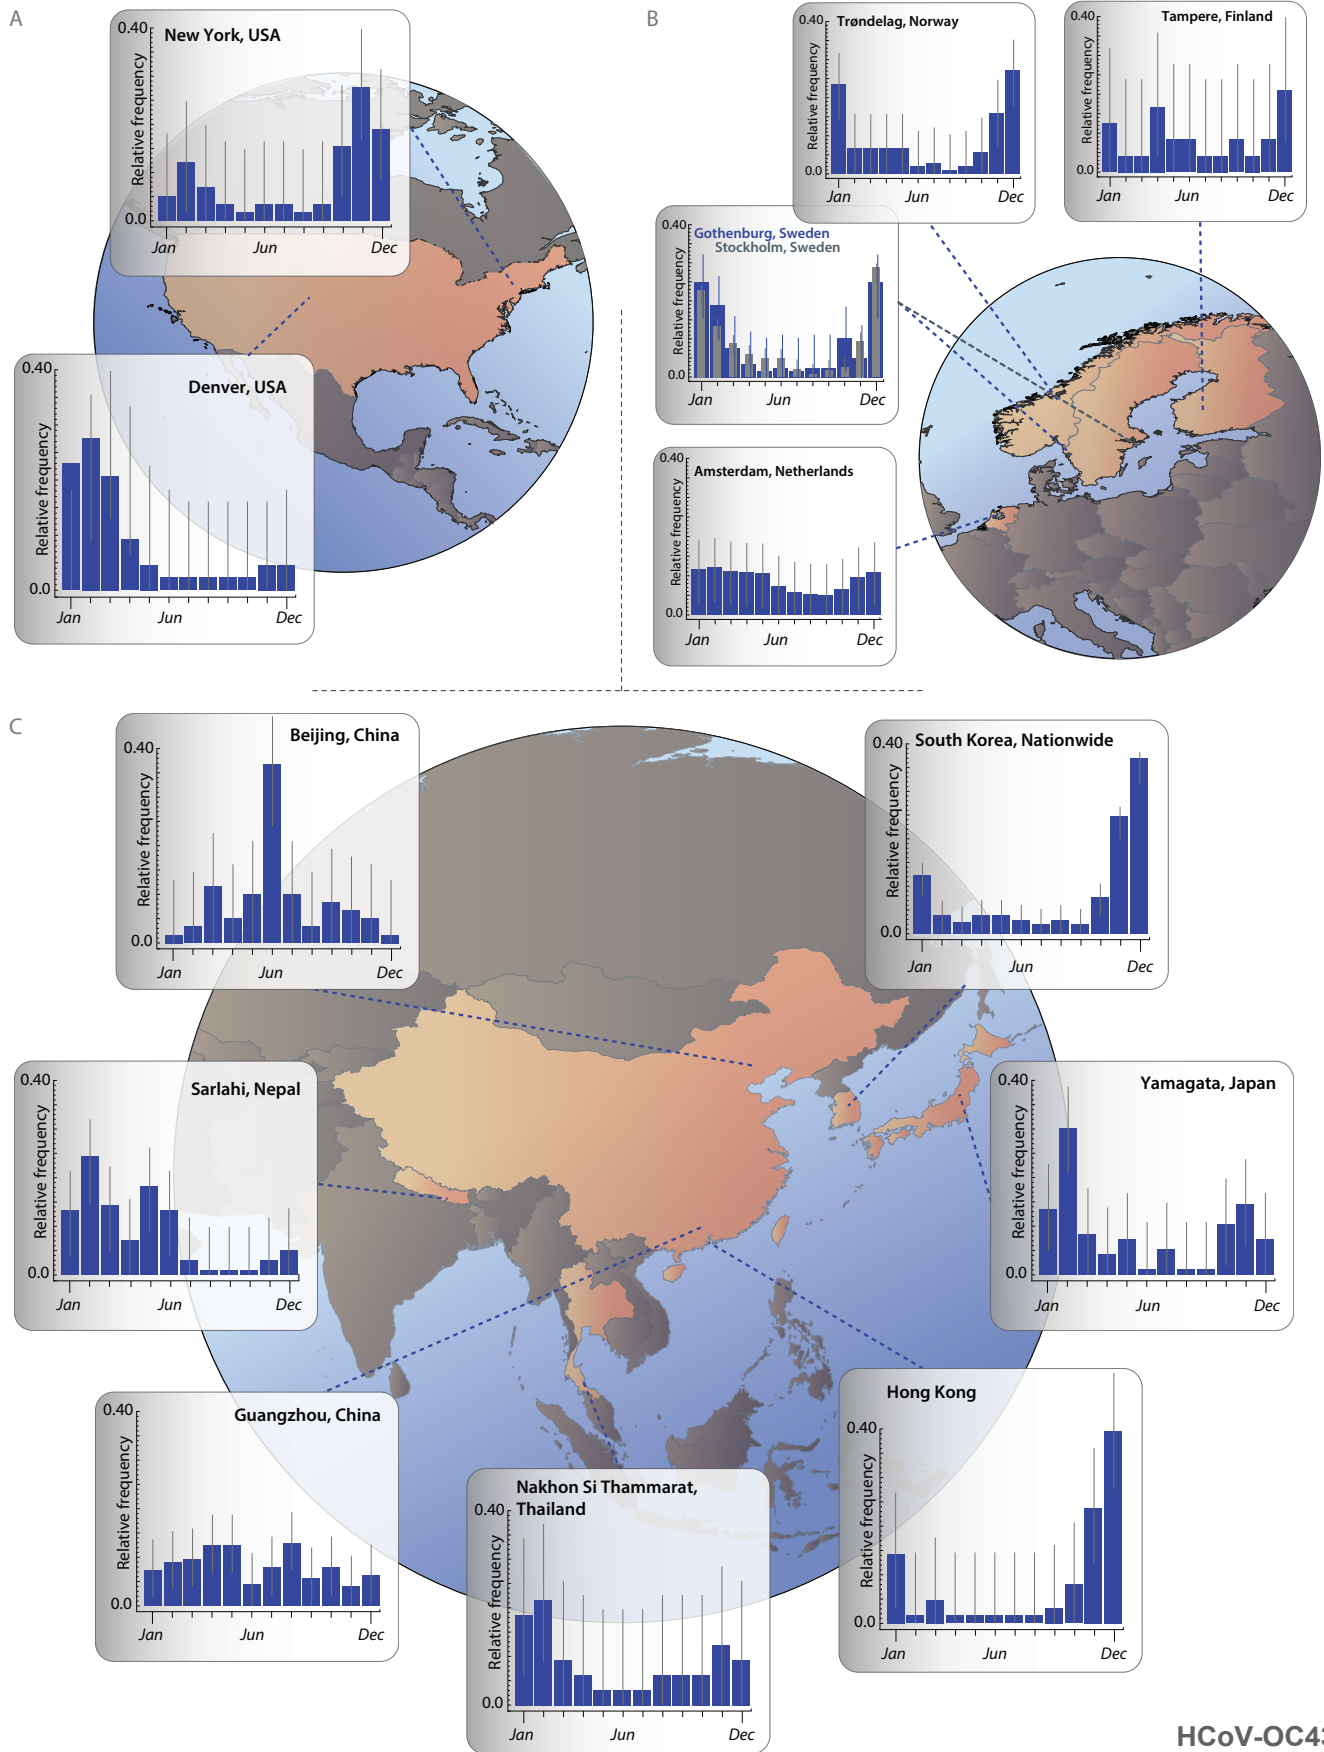

HCoV-OC43

## Supplementary Figure S4

Proportions of HCoV-OC43 infections by month across locations in (A) North America, (B) Europe, and (C) Asia. Vertical gray bars indicate 95% confidence interval of raw monthly infections.

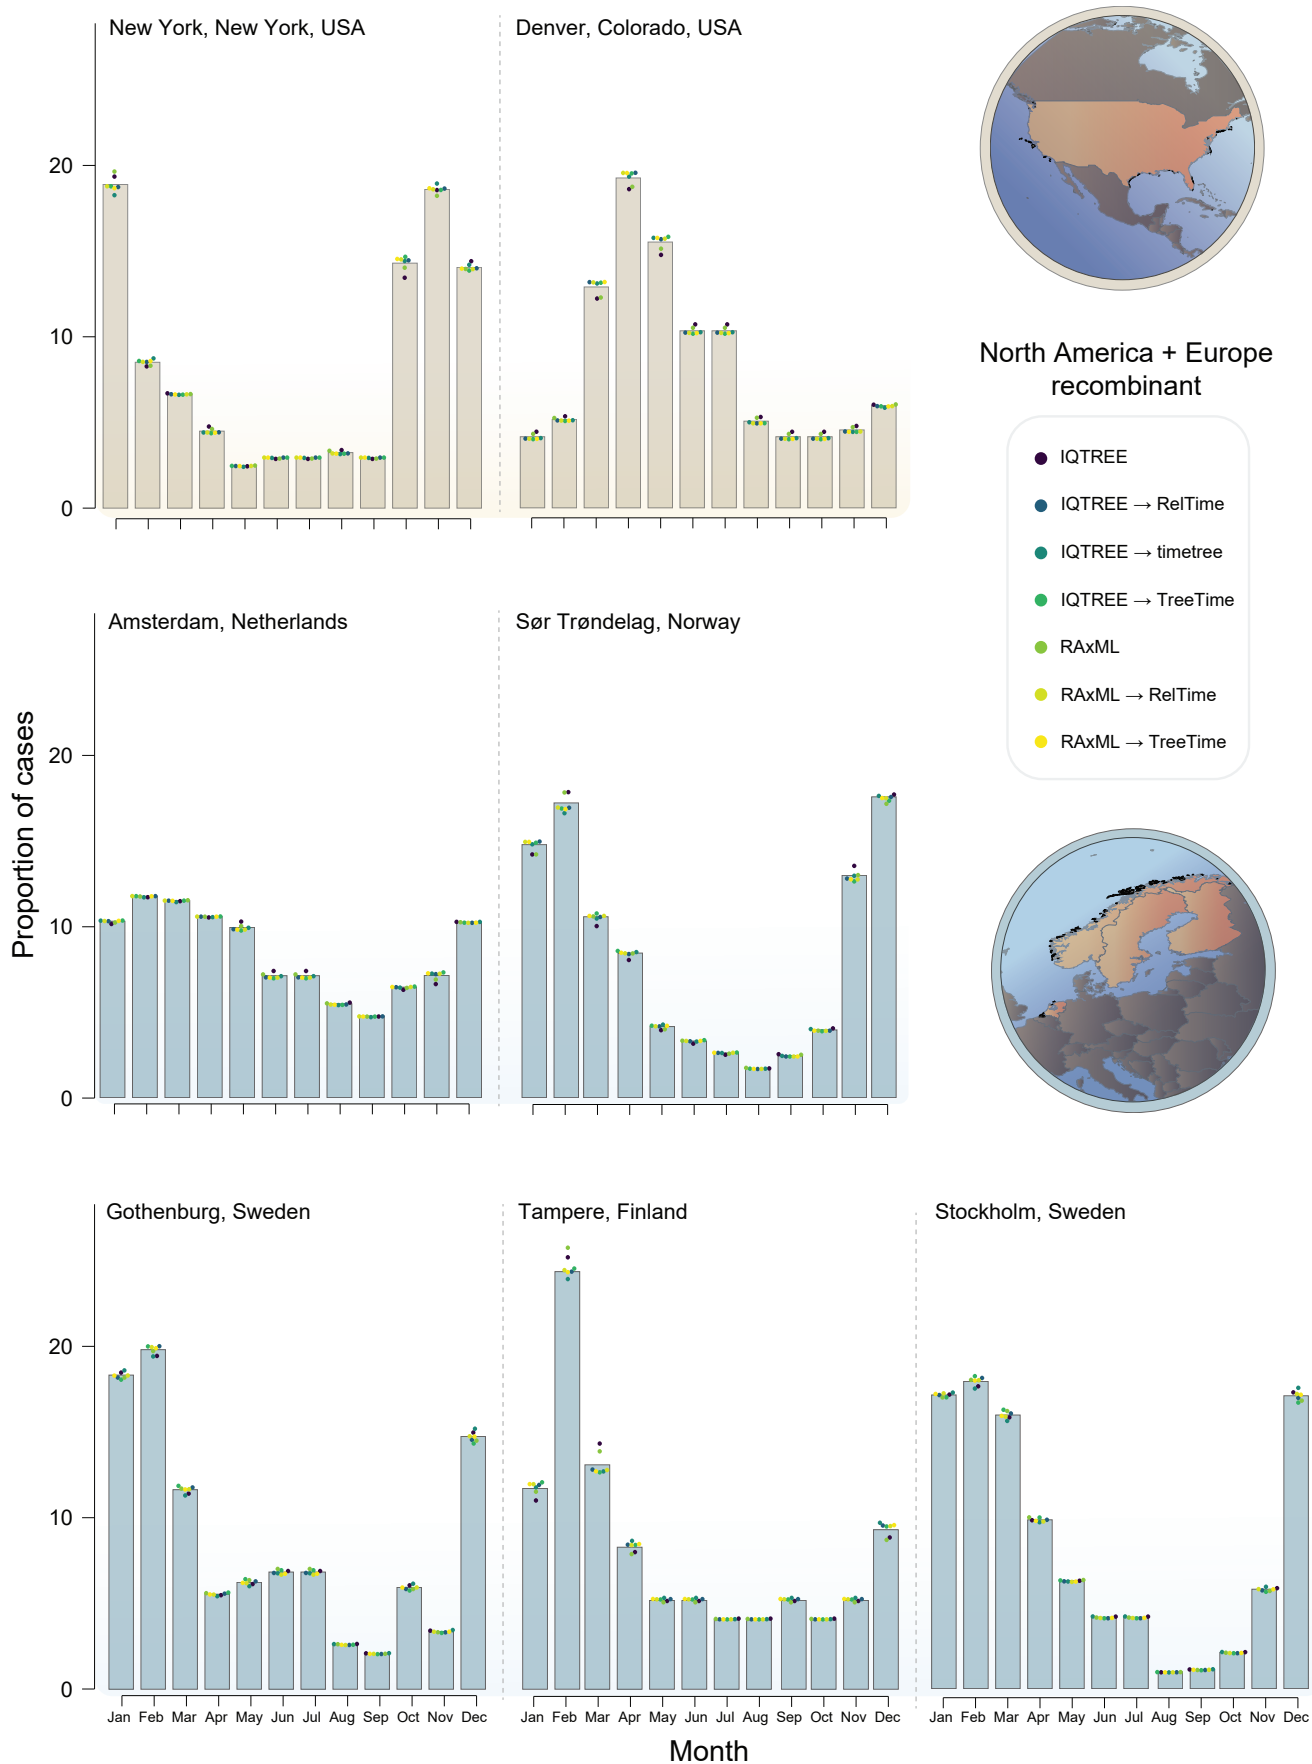

Supplementary Figure S5

Sensitivity of proportions of SARS-CoV-2 infections by month to method of time tree inference in North America (tan) and Europe (blue).

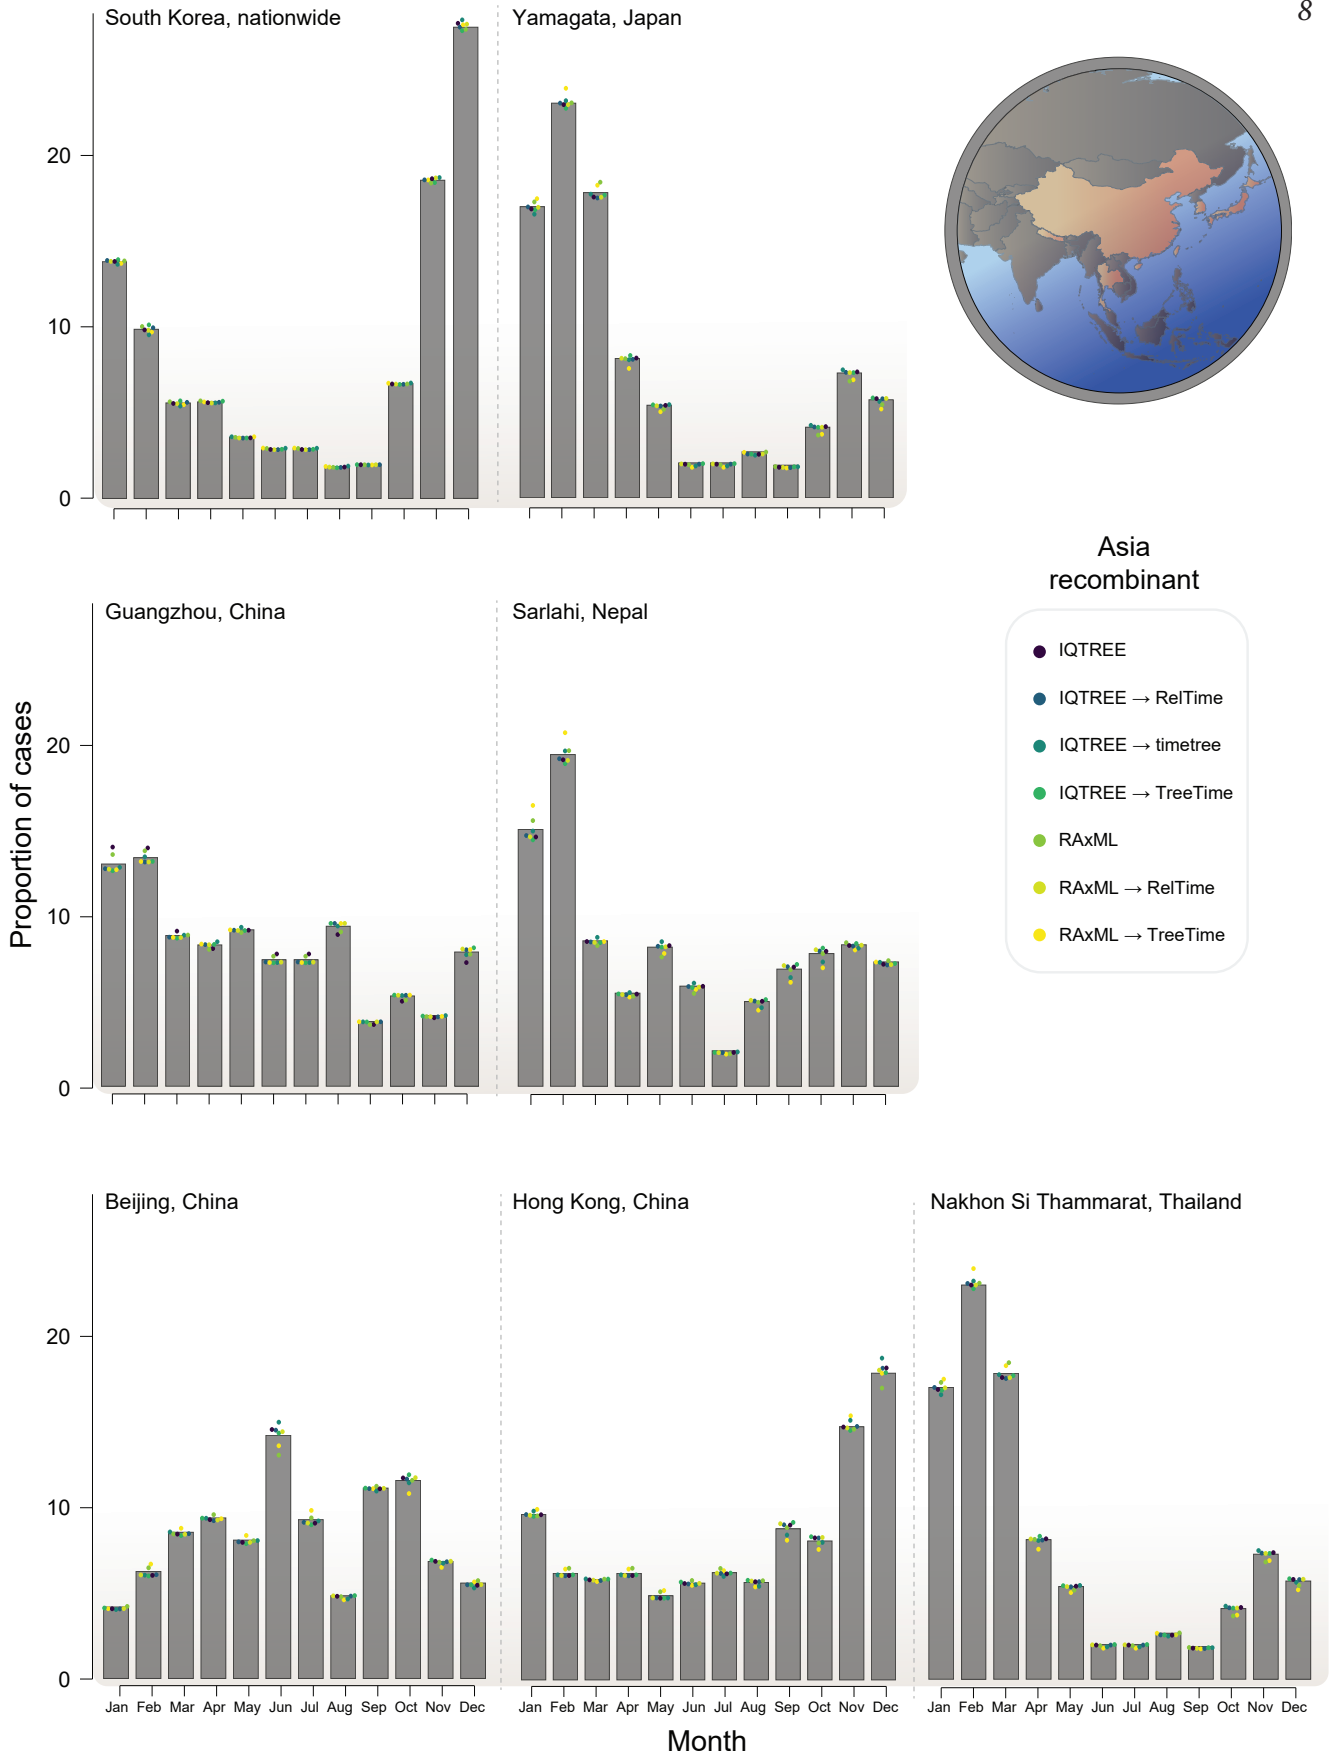

Supplementary Figure S6

Sensitivity of proportions of SARS-CoV-2 infections by month to method of time tree inference in Asia.



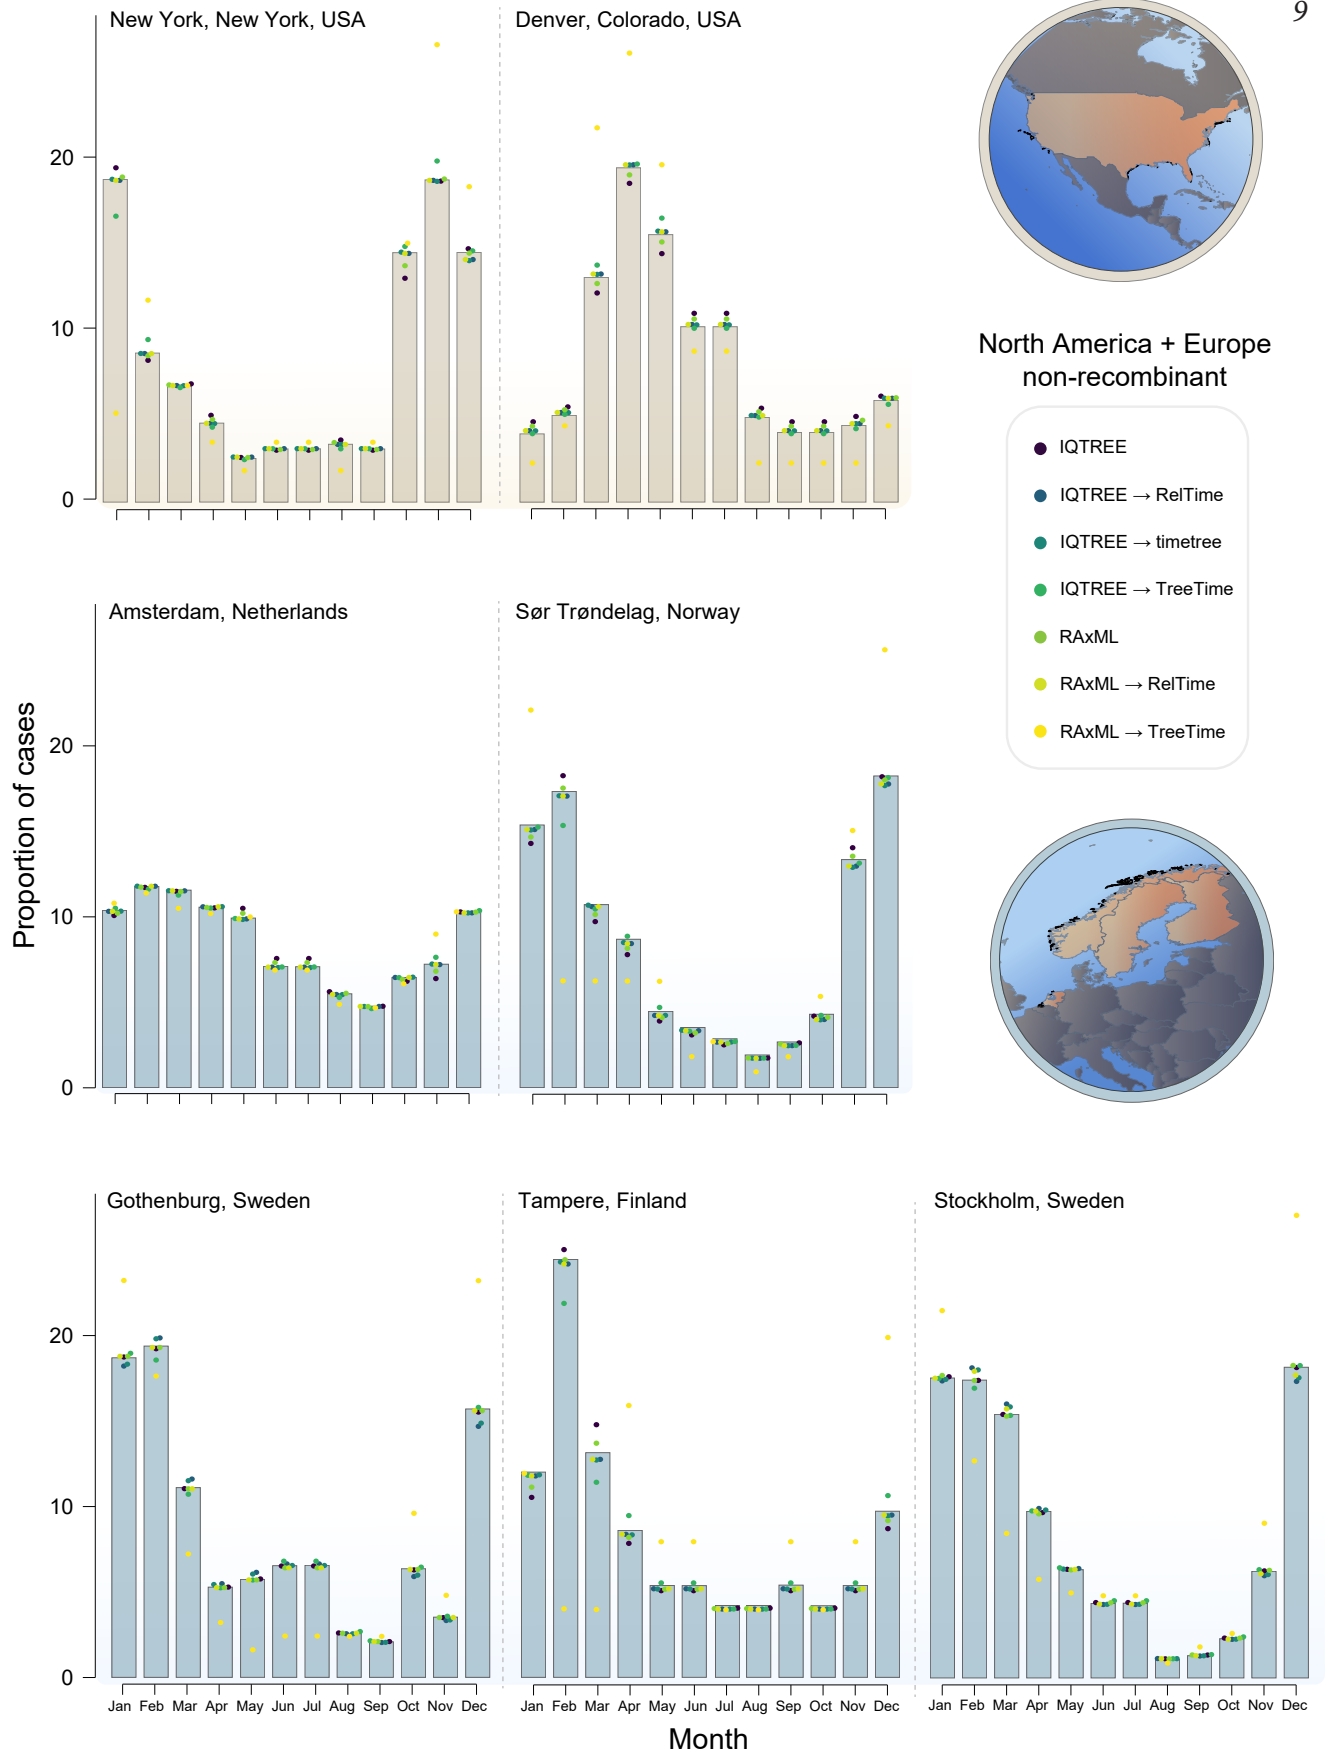

Supplementary Figure S7

Sensitivity of proportions of SARS-CoV-2 infections by month to use of only viral sequences deemed non-recombining by location, in North America (tan) and Europe (blue).

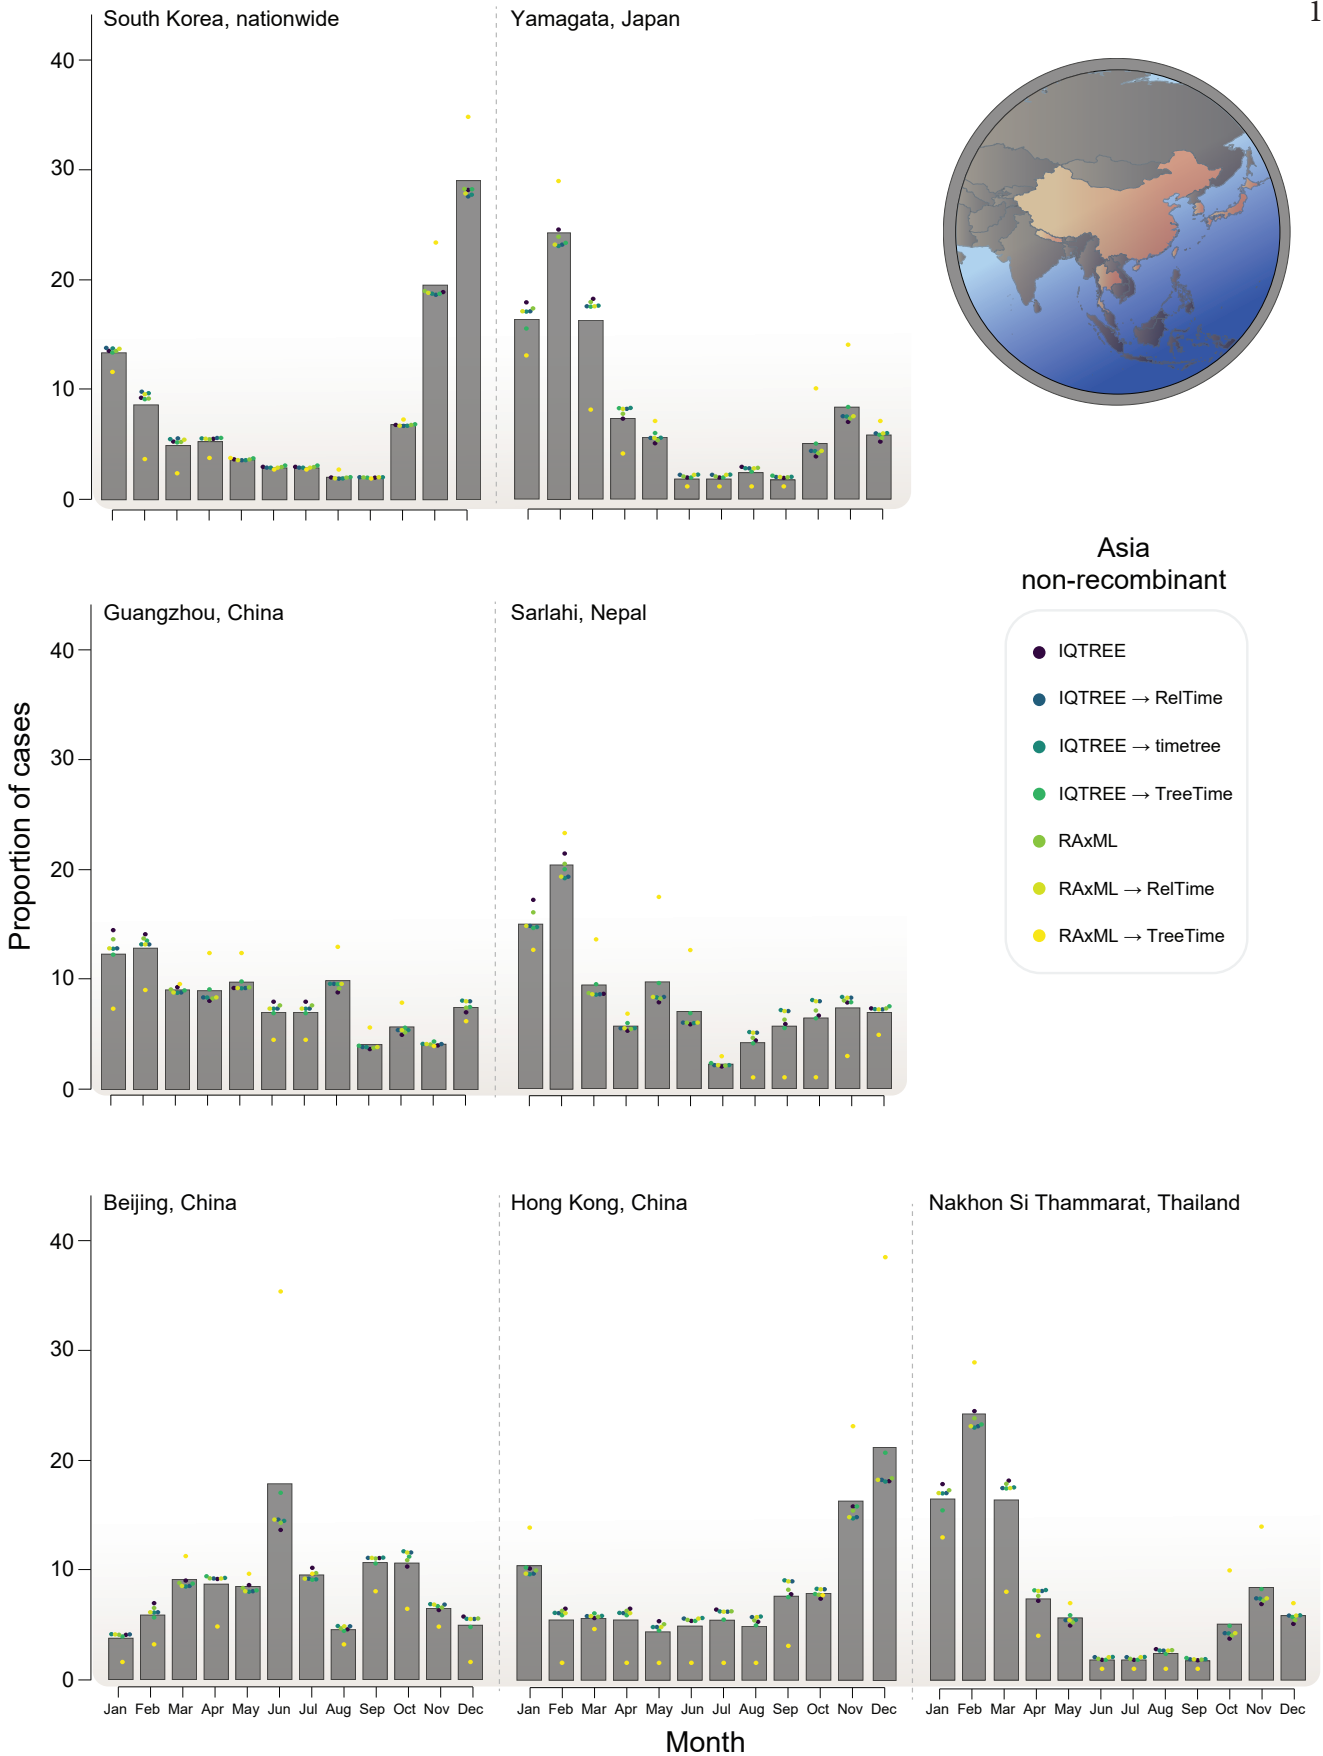

Supplementary Figure S8

Sensitivity of proportions of SARS-CoV-2 infections by month to use of only viral sequences deemed non-recombining by location, in Asia.
